# Supplementary material for: Synthesis, Structure, Spectral-Luminescent Properties, and Biological Activity of Chlorine-Substituted N-[2-(Phenyliminomethyl)phenyl]-4-methylbenzenesulfamide and Their Zinc(II) Complexes
Source: MDPI journal article supplement (doi:10.3390/ijms232315259), 2022-12-03

# Synthesis, Structure, Spectral-Luminescent Properties, and Biological Activity of Chlorine-Substituted *N*-[2-(Phenyliminomethyl)phenyl]-4-methylbenzenesulfamide and Their Zinc(II) Complexes

Anatolii S. Burlov <sup>1</sup>, Valery G. Vlasenko <sup>2</sup>, Maxim S. Milutka <sup>1</sup>, Yurii V. Koshchienko <sup>1</sup>, Nadezhda I. Makarova <sup>1</sup>, Vladimir A. Lazarenko <sup>3</sup>, Alexander L. Trigub <sup>3</sup>, Alexandra A. Kolodina <sup>1</sup>, Alexander A. Zubenko <sup>4</sup>, Anatoly V. Metelitsa <sup>1</sup>, Dmitrii A. Garnovskii <sup>5</sup>, Alexey N. Gusev <sup>6,\*</sup> and Wolfgang Linert <sup>7</sup>

<sup>1</sup> Institute of Physical and Organic Chemistry, Southern Federal University, 344090 Rostov-on-Don, Russia; anatoly.burlov@yandex.ru (A.S.B.); milutka.maxim@yandex.ru (M.S.M.); yukoshch@yandex.ru (Y.V.K.); nimakarova@sfedu.ru (N.I.M.); akolodina@sfedu.ru (A.A.K.); avmetelitsa@sfedu.ru (A.V.M.)

<sup>2</sup> Institute of Physics, Southern Federal University, 344090 Rostov-on-Don, Russia; vgvlasenko@sfedu.ru

<sup>3</sup> National Research Centre "Kurchatov Institute", 123182 Moscow, Russia; vladimir.a.lazarenko@gmail.com (V.A.L.); alexander.trigub@gmail.com (A.L.T.)

<sup>4</sup> North-Caucasian Zonal Scientific Research Veterinary Institute, Branch of the Federal State Budget Scientific Institution "Federal Rostov Agricultural Research Centre", 346421 Novocherkassk, Russia; alexsandrzubenko@yandex.ru

<sup>5</sup> Southern Scientific Center of Russian Academy of Sciences, 344006 Rostov-on-Don, Russia; ayueliseeva@mail.ru

<sup>6</sup> General Chemistry Department, Crimean Federal University V.I. Vernadsky, 295007 Simferopol, Russia

<sup>7</sup> Institute of Applied Physics, Vienna University of Technology, Wiedner Hauptstraße 8-10, 1040 Vienna, Austria; wolfgang.linert@tuwien.ac.at

\* Correspondence: galex0330@gmail.com; Tel.: +7-978-723-4813

**Table S1.** Crystal data and structure refinement for **2a** and **2d**.

| CCDC                               | 2203056                                                                                                                          | 2203057                                                                                                                                |
|------------------------------------|----------------------------------------------------------------------------------------------------------------------------------|----------------------------------------------------------------------------------------------------------------------------------------|
| Identification code                | <b>2a</b>                                                                                                                        | <b>2d</b>                                                                                                                              |
| Empirical formula                  | C <sub>40</sub> H <sub>32</sub> Cl <sub>2</sub> N <sub>4</sub> O <sub>4</sub> S <sub>2</sub> Zn                                  | C <sub>40</sub> H <sub>28</sub> Cl <sub>6</sub> N <sub>4</sub> O <sub>4</sub> S <sub>2</sub> Zn                                        |
| Formula weight                     | 833.08                                                                                                                           | 970.87                                                                                                                                 |
| Temperature                        | 100(2) K                                                                                                                         | 100(2) K                                                                                                                               |
| Wavelength                         | 0.7454 Å                                                                                                                         | 0.71073 Å                                                                                                                              |
| Crystal system                     | Monoclinic                                                                                                                       | Monoclinic                                                                                                                             |
| Space group                        | <i>C2/c</i>                                                                                                                      | <i>C2/c</i>                                                                                                                            |
| Unit cell dimensions               | a = 18.568(4) Å<br>b = 20.748(4) Å<br>c = 10.689(2) Å<br>$\alpha = 90^\circ$<br>$\beta = 114.69(3)^\circ$<br>$\gamma = 90^\circ$ | a = 14.7467(3) Å<br>b = 20.4680(4) Å<br>c = 13.6156(3) Å<br>$\alpha = 90^\circ$<br>$\beta = 100.7570(10)^\circ$<br>$\gamma = 90^\circ$ |
| Volume                             | 3741.4 (15) Å <sup>3</sup>                                                                                                       | 4037.45(15) Å <sup>3</sup>                                                                                                             |
| Z                                  | 4                                                                                                                                | 4                                                                                                                                      |
| Density (calculated)               | 1.4797 Mg/m <sup>3</sup>                                                                                                         | 1.597 Mg/m <sup>3</sup>                                                                                                                |
| Absorption coefficient             | 1.08 mm <sup>-1</sup>                                                                                                            | 1.157 mm <sup>-1</sup>                                                                                                                 |
| F(000)                             | 1712                                                                                                                             | 1968                                                                                                                                   |
| Crystal size                       | 0.3 × 0.1 × 0.05 mm <sup>3</sup>                                                                                                 | 0.18 x 0.09 x 0.09 mm <sup>3</sup>                                                                                                     |
| Theta range for data collection    | 1.6 to 31.0°                                                                                                                     | 2.118 to 32.697°                                                                                                                       |
| Index ranges                       | -25 ≤ h ≤ 24, -28 ≤ k ≤ 28,<br>-14 ≤ l ≤ 14                                                                                      | -22 ≤ h ≤ 22, -31 ≤ k ≤ 30,<br>-20 ≤ l ≤ 20                                                                                            |
| Reflections collected              | 19362                                                                                                                            | 46971                                                                                                                                  |
| Independent reflections            | 4459                                                                                                                             | 7402 [R(int) = 0.0485]                                                                                                                 |
| Completeness to theta =<br>25.242° | 99.9 %                                                                                                                           | 99.9 %                                                                                                                                 |
| Absorption correction              | Semi-empirical from<br>equivalents                                                                                               | Semi-empirical from<br>equivalents                                                                                                     |
| Max. and min. transmission         | 1.000 and 0.721                                                                                                                  | 0.888 and 0.800                                                                                                                        |
| Refinement method                  | Full-matrix least-squares on F <sup>2</sup>                                                                                      | Full-matrix least-squares on F <sup>2</sup>                                                                                            |
| Data / restraints / parameters     | 4869 / 0 / 241                                                                                                                   | 7402 / 0 / 259                                                                                                                         |
| Goodness-of-fit on F <sup>2</sup>  | 1.09                                                                                                                             | 1.028                                                                                                                                  |
| R indices (all data)               | R <sub>int</sub> = 0.0596, R1 = 0.389, wR2<br>= 0.0989                                                                           | R <sub>int</sub> = 0.0485, R1 = 0.0463, wR2<br>= 0.0754                                                                                |
| Extinction coefficient             | n/a                                                                                                                              | n/a                                                                                                                                    |
| Largest diff. peak and hole        | 0.45 and -0.86 e, Å <sup>-3</sup>                                                                                                | 0.477 and -0.425 e, Å <sup>-3</sup>                                                                                                    |

**Table S2.** Atomic coordinates ( $\times 10^4$ ) and equivalent isotropic displacement parameters ( $\text{\AA}^2 \times 10^3$ ) for **2a**.  $U(\text{eq})$  is defined as one third of the trace of the orthogonalized  $U^{\text{ij}}$  tensor.

| Atom | <i>x</i>     | <i>y</i>    | <i>z</i>      | $U_{\text{iso}}^*/U_{\text{eq}}$ |
|------|--------------|-------------|---------------|----------------------------------|
| Zn1  | 0.500000     | 0.22198 (2) | 0.250000      | 0.02002 (8)                      |
| S1   | 0.47203 (2)  | 0.30795 (2) | 0.44491 (4)   | 0.01994 (9)                      |
| Cl1  | 0.63733 (3)  | 0.01791 (3) | -0.14208 (6)  | 0.04547 (14)                     |
| O1   | 0.42074 (7)  | 0.31838 (6) | 0.30061 (12)  | 0.0231 (2)                       |
| O2   | 0.43308 (7)  | 0.29498 (6) | 0.53395 (12)  | 0.0240 (2)                       |
| N2   | 0.60157 (8)  | 0.16902 (6) | 0.30037 (14)  | 0.0216 (3)                       |
| N1   | 0.53148 (8)  | 0.25248 (6) | 0.44080 (14)  | 0.0207 (3)                       |
| C13  | 0.59705 (9)  | 0.23392 (7) | 0.55956 (17)  | 0.0211 (3)                       |
| C8   | 0.65972 (9)  | 0.19879 (7) | 0.54675 (17)  | 0.0224 (3)                       |
| C7   | 0.65913 (9)  | 0.17094 (8) | 0.42223 (17)  | 0.0233 (3)                       |
| H7   | 0.706311     | 0.151890    | 0.430833      | 0.028*                           |
| C4   | 0.61319 (9)  | 0.13530 (7) | 0.19374 (17)  | 0.0224 (3)                       |
| C14  | 0.53196 (9)  | 0.37722 (7) | 0.51164 (17)  | 0.0223 (3)                       |
| C11  | 0.67372 (10) | 0.23400 (9) | 0.80845 (18)  | 0.0270 (3)                       |
| H11  | 0.677172     | 0.244143    | 0.895524      | 0.032*                           |
| C12  | 0.60542 (10) | 0.24953 (8) | 0.69290 (17)  | 0.0250 (3)                       |
| H12  | 0.564333     | 0.270718    | 0.704002      | 0.030*                           |
| C9   | 0.72906 (10) | 0.18592 (8) | 0.66641 (18)  | 0.0263 (3)                       |
| H9   | 0.770877     | 0.164794    | 0.657593      | 0.032*                           |
| C19  | 0.51859 (10) | 0.41530 (8) | 0.60619 (18)  | 0.0264 (3)                       |
| H19  | 0.478076     | 0.405187    | 0.632433      | 0.032*                           |
| C5   | 0.68596 (10) | 0.13276 (9) | 0.18456 (18)  | 0.0272 (3)                       |
| H5   | 0.729340     | 0.154932    | 0.248114      | 0.033*                           |
| C15  | 0.59143 (10) | 0.39245 (8) | 0.46996 (19)  | 0.0265 (3)                       |
| H15  | 0.599437     | 0.367164    | 0.405050      | 0.032*                           |
| C10  | 0.73707 (10) | 0.20348 (9) | 0.79570 (18)  | 0.0284 (3)                       |
| H10  | 0.783785     | 0.195131    | 0.872867      | 0.034*                           |
| C17  | 0.62732 (10) | 0.48461 (8) | 0.62368 (18)  | 0.0260 (3)                       |
| C3   | 0.54763 (10) | 0.10435 (8) | 0.09382 (18)  | 0.0260 (3)                       |
| H3   | 0.498541     | 0.107418    | 0.097343      | 0.031*                           |
| C18  | 0.56649 (10) | 0.46890 (8) | 0.66155 (19)  | 0.0288 (3)                       |
| H18  | 0.557600     | 0.494613    | 0.724966      | 0.035*                           |
| C16  | 0.63882 (10) | 0.44605 (8) | 0.52668 (19)  | 0.0279 (3)                       |
| H16  | 0.678896     | 0.456380    | 0.499477      | 0.034*                           |
| C6   | 0.69375 (11) | 0.09728 (9) | 0.0810 (2)    | 0.0320 (4)                       |
| H6   | 0.742355     | 0.095055    | 0.075482      | 0.038*                           |
| C2   | 0.55475 (11) | 0.06916 (9) | -0.01039 (19) | 0.0295 (4)                       |
| H2   | 0.510925     | 0.048574    | -0.076675     | 0.035*                           |
| C1   | 0.62824 (11) | 0.06509 (9) | -0.01436 (19) | 0.0306 (4)                       |
| C20  | 0.67908 (11) | 0.54212 (9) | 0.6857 (2)    | 0.0324 (4)                       |
| H20A | 0.651980     | 0.571477    | 0.720729      | 0.049*                           |
| H20B | 0.690790     | 0.563334    | 0.616570      | 0.049*                           |
| H20C | 0.727566     | 0.528311    | 0.759524      | 0.049*                           |

**Table S3.** Bond lengths [Å] and angles [°] for **2a**.

|                                      |             |             |             |
|--------------------------------------|-------------|-------------|-------------|
| Zn1—N2                               | 2.0508 (14) | C4—C5       | 1.396 (2)   |
| Zn1—N2 <sup>i</sup>                  | 2.0507 (14) | C4—C3       | 1.396 (2)   |
| Zn1—N1 <sup>i</sup>                  | 1.9763 (14) | C14—C19     | 1.384 (2)   |
| Zn1—N1                               | 1.9763 (14) | C14—C15     | 1.389 (2)   |
| S1—O1                                | 1.4511 (13) | C11—C12     | 1.389 (2)   |
| S1—O2                                | 1.4410 (13) | C11—C10     | 1.392 (2)   |
| S1—N1                                | 1.6078 (14) | C9—C10      | 1.376 (3)   |
| S1—C14                               | 1.7747 (16) | C19—C18     | 1.392 (2)   |
| C11—C1                               | 1.7444 (19) | C5—C6       | 1.386 (3)   |
| N2—C7                                | 1.295 (2)   | C15—C16     | 1.390 (2)   |
| N2—C4                                | 1.429 (2)   | C17—C18     | 1.388 (3)   |
| N1—C13                               | 1.397 (2)   | C17—C16     | 1.395 (2)   |
| C13—C8                               | 1.427 (2)   | C17—C20     | 1.502 (2)   |
| C13—C12                              | 1.406 (2)   | C3—C2       | 1.384 (2)   |
| C8—C7                                | 1.447 (2)   | C6—C1       | 1.389 (3)   |
| C8—C9                                | 1.410 (2)   | C2—C1       | 1.385 (3)   |
|                                      |             |             |             |
| N2 <sup>i</sup> —Zn1—N2              | 115.21 (8)  | C5—C4—N2    | 123.21 (14) |
| N1—Zn1—N2 <sup>i</sup>               | 106.60 (6)  | C5—C4—C3    | 119.29 (16) |
| N1 <sup>i</sup> —Zn1—N2              | 106.60 (6)  | C3—C4—N2    | 117.50 (15) |
| N1 <sup>i</sup> —Zn1—N2 <sup>i</sup> | 93.30 (6)   | C19—C14—S1  | 118.82 (13) |
| N1—Zn1—N2                            | 93.30 (6)   | C19—C14—C15 | 120.89 (15) |
| N1—Zn1—N1 <sup>i</sup>               | 142.64 (8)  | C15—C14—S1  | 120.29 (13) |
| O1—S1—N1                             | 103.35 (7)  | C12—C11—C10 | 120.91 (17) |
| O1—S1—C14                            | 109.23 (8)  | C11—C12—C13 | 121.43 (16) |
| O2—S1—O1                             | 116.25 (7)  | C10—C9—C8   | 122.38 (16) |
| O2—S1—N1                             | 115.09 (7)  | C14—C19—C18 | 119.25 (16) |
| O2—S1—C14                            | 106.81 (8)  | C6—C5—C4    | 120.20 (16) |
| N1—S1—C14                            | 105.57 (7)  | C14—C15—C16 | 119.03 (16) |
| C7—N2—Zn1                            | 121.98 (12) | C9—C10—C11  | 118.52 (15) |
| C7—N2—C4                             | 118.77 (14) | C18—C17—C16 | 118.55 (15) |
| C4—N2—Zn1                            | 118.80 (10) | C18—C17—C20 | 120.42 (16) |
| S1—N1—Zn1                            | 110.30 (7)  | C16—C17—C20 | 121.03 (16) |
| C13—N1—Zn1                           | 128.27 (11) | C2—C3—C4    | 120.84 (16) |
| C13—N1—S1                            | 121.35 (11) | C17—C18—C19 | 121.11 (16) |
| N1—C13—C8                            | 119.32 (15) | C15—C16—C17 | 121.16 (16) |
| N1—C13—C12                           | 122.91 (15) | C5—C6—C1    | 119.34 (17) |
| C12—C13—C8                           | 117.75 (14) | C3—C2—C1    | 118.90 (16) |
| C13—C8—C7                            | 126.79 (14) | C6—C1—C11   | 120.20 (15) |
| C9—C8—C13                            | 118.80 (15) | C2—C1—C11   | 118.46 (14) |
| C9—C8—C7                             | 114.33 (14) | C2—C1—C6    | 121.33 (17) |
| N2—C7—C8                             | 128.57 (15) |             |             |

Symmetry code: (i) -x+1, y, -z+1/2.

**Table S4.** Anisotropic displacement parameters ( $\text{\AA}^2 \times 10^3$ ) for **2a**. The anisotropic displacement factor exponent takes the form:  $-2\pi^2 [h^2 a^{*2} U^{11} + \dots + 2 h k a^* b^* U^{12}]$

|     | $U^{11}$     | $U^{22}$     | $U^{33}$     | $U^{12}$     | $U^{13}$     | $U^{23}$      |
|-----|--------------|--------------|--------------|--------------|--------------|---------------|
| Zn1 | 0.01965 (13) | 0.01809 (13) | 0.01991 (13) | 0.000        | 0.00588 (10) | 0.000         |
| S1  | 0.01884 (16) | 0.01908 (17) | 0.02066 (18) | 0.00102 (12) | 0.00703 (14) | -0.00033 (12) |
| Cl1 | 0.0437 (3)   | 0.0542 (3)   | 0.0416 (3)   | 0.0015 (2)   | 0.0209 (2)   | -0.0204 (2)   |
| O1  | 0.0214 (5)   | 0.0236 (5)   | 0.0218 (5)   | 0.0029 (4)   | 0.0064 (4)   | 0.0008 (4)    |
| O2  | 0.0220 (5)   | 0.0260 (5)   | 0.0248 (6)   | -0.0003 (4)  | 0.0106 (4)   | 0.0002 (4)    |
| N2  | 0.0219 (6)   | 0.0178 (6)   | 0.0236 (6)   | 0.0016 (4)   | 0.0080 (5)   | 0.0003 (5)    |
| N1  | 0.0211 (6)   | 0.0203 (6)   | 0.0190 (6)   | 0.0011 (4)   | 0.0067 (5)   | -0.0013 (5)   |
| C13 | 0.0201 (6)   | 0.0176 (6)   | 0.0232 (7)   | 0.0004 (5)   | 0.0067 (6)   | 0.0003 (5)    |
| C8  | 0.0222 (7)   | 0.0197 (7)   | 0.0229 (7)   | 0.0013 (5)   | 0.0070 (6)   | 0.0001 (5)    |
| C7  | 0.0223 (7)   | 0.0202 (7)   | 0.0258 (8)   | 0.0023 (5)   | 0.0085 (6)   | 0.0001 (6)    |
| C4  | 0.0246 (7)   | 0.0186 (6)   | 0.0227 (7)   | 0.0024 (5)   | 0.0086 (6)   | 0.0010 (5)    |
| C14 | 0.0223 (7)   | 0.0195 (7)   | 0.0233 (7)   | 0.0013 (5)   | 0.0078 (6)   | -0.0004 (5)   |
| C11 | 0.0267 (8)   | 0.0286 (8)   | 0.0221 (7)   | 0.0033 (6)   | 0.0067 (6)   | -0.0016 (6)   |
| C12 | 0.0241 (7)   | 0.0250 (7)   | 0.0241 (8)   | 0.0025 (6)   | 0.0083 (6)   | -0.0004 (6)   |
| C9  | 0.0226 (7)   | 0.0250 (7)   | 0.0269 (8)   | 0.0050 (6)   | 0.0061 (6)   | -0.0006 (6)   |
| C19 | 0.0255 (7)   | 0.0257 (8)   | 0.0292 (8)   | -0.0020 (6)  | 0.0125 (6)   | -0.0050 (6)   |
| C5  | 0.0252 (7)   | 0.0283 (8)   | 0.0275 (8)   | -0.0001 (6)  | 0.0104 (6)   | -0.0028 (6)   |
| C15 | 0.0300 (8)   | 0.0222 (7)   | 0.0301 (8)   | -0.0019 (6)  | 0.0154 (7)   | -0.0043 (6)   |
| C10 | 0.0252 (7)   | 0.0282 (8)   | 0.0246 (8)   | 0.0047 (6)   | 0.0034 (6)   | -0.0012 (6)   |
| C17 | 0.0261 (7)   | 0.0198 (7)   | 0.0297 (8)   | 0.0006 (5)   | 0.0092 (6)   | -0.0019 (6)   |
| C3  | 0.0242 (7)   | 0.0239 (7)   | 0.0290 (8)   | 0.0000 (6)   | 0.0103 (6)   | -0.0023 (6)   |
| C18 | 0.0296 (8)   | 0.0259 (8)   | 0.0320 (9)   | -0.0021 (6)  | 0.0139 (7)   | -0.0081 (6)   |
| C16 | 0.0291 (8)   | 0.0236 (8)   | 0.0341 (9)   | -0.0034 (6)  | 0.0161 (7)   | -0.0029 (6)   |
| C6  | 0.0277 (8)   | 0.0366 (9)   | 0.0336 (9)   | 0.0003 (7)   | 0.0145 (7)   | -0.0058 (7)   |
| C2  | 0.0307 (8)   | 0.0270 (8)   | 0.0297 (8)   | -0.0019 (6)  | 0.0116 (7)   | -0.0055 (6)   |
| C1  | 0.0353 (9)   | 0.0303 (8)   | 0.0282 (8)   | 0.0020 (7)   | 0.0151 (7)   | -0.0062 (7)   |
| C20 | 0.0317 (8)   | 0.0241 (8)   | 0.0428 (10)  | -0.0033 (6)  | 0.0170 (8)   | -0.0077 (7)   |

**Table S5.** Atomic coordinates ( $\times 10^4$ ) and equivalent isotropic displacement parameters ( $\text{\AA}^2 \times 10^3$ ) for **2d**.  $U(\text{eq})$  is defined as one third of the trace of the orthogonalized  $U_{ij}$  tensor.

| Atom  | x       | y       | z       | $U(\text{eq})$ |
|-------|---------|---------|---------|----------------|
| Zn(1) | 5000    | 5313(1) | 2500    | 11(1)          |
| Cl(1) | 9403(1) | 5342(1) | 739(1)  | 26(1)          |
| Cl(2) | 5448(1) | 2173(1) | 1176(1) | 26(1)          |
| Cl(3) | 3286(1) | 2197(1) | 957(1)  | 29(1)          |
| S(1)  | 6273(1) | 6238(1) | 3728(1) | 12(1)          |
| O(1)  | 5389(1) | 6147(1) | 4031(1) | 16(1)          |
| O(2)  | 7074(1) | 6174(1) | 4516(1) | 17(1)          |
| N(1)  | 6243(1) | 5719(1) | 2831(1) | 13(1)          |
| N(2)  | 5415(1) | 4662(1) | 1537(1) | 13(1)          |
| C(1)  | 6994(1) | 5629(1) | 2356(1) | 12(1)          |
| C(2)  | 6919(1) | 5186(1) | 1539(1) | 12(1)          |
| C(3)  | 7671(1) | 5111(1) | 1038(1) | 15(1)          |
| C(4)  | 8476(1) | 5450(1) | 1345(1) | 16(1)          |
| C(5)  | 8571(1) | 5864(1) | 2162(1) | 17(1)          |
| C(6)  | 7841(1) | 5954(1) | 2652(1) | 16(1)          |
| C(7)  | 6183(1) | 4723(1) | 1214(1) | 13(1)          |
| C(8)  | 6313(1) | 7027(1) | 3209(1) | 14(1)          |
| C(9)  | 6532(1) | 7552(1) | 3860(1) | 19(1)          |
| C(10) | 6505(1) | 8181(1) | 3474(1) | 23(1)          |
| C(11) | 6262(1) | 8295(1) | 2444(1) | 21(1)          |
| C(12) | 6057(1) | 7761(1) | 1815(1) | 18(1)          |
| C(13) | 6079(1) | 7127(1) | 2185(1) | 16(1)          |
| C(14) | 6214(1) | 8980(1) | 2033(1) | 32(1)          |
| C(15) | 4904(1) | 4074(1) | 1293(1) | 13(1)          |
| C(16) | 5363(1) | 3479(1) | 1301(1) | 15(1)          |
| C(17) | 4860(1) | 2904(1) | 1158(1) | 17(1)          |
| C(18) | 3903(1) | 2917(1) | 1031(1) | 18(1)          |
| C(19) | 3446(1) | 3512(1) | 1005(1) | 20(1)          |
| C(20) | 3944(1) | 4090(1) | 1140(1) | 17(1)          |

**Table S6.** Bond lengths [Å] and angles [°] for **2d**.

|                     |            |                  |            |
|---------------------|------------|------------------|------------|
| Zn(1)-N(1)#1        | 1.9867(12) | C(7)-H(7)        | 0.9500     |
| Zn(1)-N(1)          | 1.9867(12) | C(8)-C(13)       | 1.3880(19) |
| Zn(1)-N(2)#1        | 2.0407(11) | C(8)-C(9)        | 1.3915(19) |
| Zn(1)-N(2)          | 2.0408(11) | C(9)-C(10)       | 1.390(2)   |
| Cl(1)-C(4)          | 1.7381(14) | C(9)-H(9)        | 0.9500     |
| Cl(2)-C(17)         | 1.7284(15) | C(10)-C(11)      | 1.400(2)   |
| Cl(3)-C(18)         | 1.7241(14) | C(10)-H(10)      | 0.9500     |
| S(1)-O(2)           | 1.4450(11) | C(11)-C(12)      | 1.387(2)   |
| S(1)-O(1)           | 1.4500(10) | C(11)-C(14)      | 1.506(2)   |
| S(1)-N(1)           | 1.6126(11) | C(12)-C(13)      | 1.390(2)   |
| S(1)-C(8)           | 1.7676(14) | C(12)-H(12)      | 0.9500     |
| N(1)-C(1)           | 1.3956(17) | C(13)-H(13)      | 0.9500     |
| N(2)-C(7)           | 1.2954(17) | C(14)-H(14A)     | 0.9800     |
| N(2)-C(15)          | 1.4255(17) | C(14)-H(14B)     | 0.9800     |
| C(1)-C(6)           | 1.4064(19) | C(14)-H(14C)     | 0.9800     |
| C(1)-C(2)           | 1.4223(18) | C(15)-C(20)      | 1.393(2)   |
| C(2)-C(3)           | 1.4158(18) | C(15)-C(16)      | 1.3939(19) |
| C(2)-C(7)           | 1.4473(19) | C(16)-C(17)      | 1.384(2)   |
| C(3)-C(4)           | 1.371(2)   | C(16)-H(16)      | 0.9500     |
| C(3)-H(3)           | 0.9500     | C(17)-C(18)      | 1.389(2)   |
| C(4)-C(5)           | 1.384(2)   | C(18)-C(19)      | 1.389(2)   |
| C(5)-C(6)           | 1.3810(19) | C(19)-C(20)      | 1.387(2)   |
| C(5)-H(5)           | 0.9500     | C(19)-H(19)      | 0.9500     |
| C(6)-H(6)           | 0.9500     | C(20)-H(20)      | 0.9500     |
| N(1)#1-Zn(1)-N(1)   | 130.47(7)  | S(1)-N(1)-Zn(1)  | 109.97(6)  |
| N(1)#1-Zn(1)-N(2)#1 | 92.57(5)   | C(7)-N(2)-C(15)  | 117.31(11) |
| N(1)-Zn(1)-N(2)#1   | 120.12(5)  | C(7)-N(2)-Zn(1)  | 122.80(9)  |
| N(1)#1-Zn(1)-N(2)   | 120.12(5)  | C(15)-N(2)-Zn(1) | 119.46(9)  |
| N(1)-Zn(1)-N(2)     | 92.57(5)   | N(1)-C(1)-C(6)   | 122.89(12) |
| N(2)#1-Zn(1)-N(2)   | 98.56(6)   | N(1)-C(1)-C(2)   | 119.63(12) |
| O(2)-S(1)-O(1)      | 115.55(6)  | C(6)-C(1)-C(2)   | 117.49(12) |
| O(2)-S(1)-N(1)      | 113.91(6)  | C(3)-C(2)-C(1)   | 119.54(12) |
| O(1)-S(1)-N(1)      | 103.38(6)  | C(3)-C(2)-C(7)   | 113.03(12) |
| O(2)-S(1)-C(8)      | 107.21(6)  | C(1)-C(2)-C(7)   | 126.95(12) |
| O(1)-S(1)-C(8)      | 109.21(6)  | C(4)-C(3)-C(2)   | 120.60(13) |
| N(1)-S(1)-C(8)      | 107.25(6)  | C(4)-C(3)-H(3)   | 119.7      |
| C(1)-N(1)-S(1)      | 121.78(9)  | C(2)-C(3)-H(3)   | 119.7      |
| C(1)-N(1)-Zn(1)     | 128.13(9)  | C(3)-C(4)-C(5)   | 120.44(13) |

|                   |            |                     |            |
|-------------------|------------|---------------------|------------|
| C(3)-C(4)-Cl(1)   | 120.22(11) | C(8)-C(13)-H(13)    | 120.4      |
| C(5)-C(4)-Cl(1)   | 119.30(11) | C(12)-C(13)-H(13)   | 120.4      |
| C(6)-C(5)-C(4)    | 119.99(13) | C(11)-C(14)-H(14A)  | 109.5      |
| C(6)-C(5)-H(5)    | 120.0      | C(11)-C(14)-H(14B)  | 109.5      |
| C(4)-C(5)-H(5)    | 120.0      | H(14A)-C(14)-H(14B) | 109.5      |
| C(5)-C(6)-C(1)    | 121.88(13) | C(11)-C(14)-H(14C)  | 109.5      |
| C(5)-C(6)-H(6)    | 119.1      | H(14A)-C(14)-H(14C) | 109.5      |
| C(1)-C(6)-H(6)    | 119.1      | H(14B)-C(14)-H(14C) | 109.5      |
| N(2)-C(7)-C(2)    | 127.75(12) | C(20)-C(15)-C(16)   | 120.00(13) |
| N(2)-C(7)-H(7)    | 116.1      | C(20)-C(15)-N(2)    | 119.60(12) |
| C(2)-C(7)-H(7)    | 116.1      | C(16)-C(15)-N(2)    | 120.12(12) |
| C(13)-C(8)-C(9)   | 120.66(13) | C(17)-C(16)-C(15)   | 119.67(13) |
| C(13)-C(8)-S(1)   | 121.08(10) | C(17)-C(16)-H(16)   | 120.2      |
| C(9)-C(8)-S(1)    | 118.14(11) | C(15)-C(16)-H(16)   | 120.2      |
| C(10)-C(9)-C(8)   | 119.22(13) | C(16)-C(17)-C(18)   | 120.49(13) |
| C(10)-C(9)-H(9)   | 120.4      | C(16)-C(17)-Cl(2)   | 118.66(12) |
| C(8)-C(9)-H(9)    | 120.4      | C(18)-C(17)-Cl(2)   | 120.83(11) |
| C(9)-C(10)-C(11)  | 121.10(14) | C(19)-C(18)-C(17)   | 119.72(13) |
| C(9)-C(10)-H(10)  | 119.5      | C(19)-C(18)-Cl(3)   | 119.91(12) |
| C(11)-C(10)-H(10) | 119.5      | C(17)-C(18)-Cl(3)   | 120.31(11) |
| C(12)-C(11)-C(10) | 118.28(14) | C(20)-C(19)-C(18)   | 120.17(14) |
| C(12)-C(11)-C(14) | 120.93(14) | C(20)-C(19)-H(19)   | 119.9      |
| C(10)-C(11)-C(14) | 120.78(14) | C(18)-C(19)-H(19)   | 119.9      |
| C(11)-C(12)-C(13) | 121.57(13) | C(19)-C(20)-C(15)   | 119.90(14) |
| C(11)-C(12)-H(12) | 119.2      | C(19)-C(20)-H(20)   | 120.1      |
| C(13)-C(12)-H(12) | 119.2      | C(15)-C(20)-H(20)   | 120.1      |
| C(8)-C(13)-C(12)  | 119.16(13) |                     |            |

---

Symmetry transformations used to generate equivalent atoms:

#1 -x+1, y, -z+1/2



**Table S7.** Anisotropic displacement parameters ( $\text{\AA}^2 \times 10^3$ ) for **2d**. The anisotropic displacement factor exponent takes the form:  $-2\pi^2 [h^2 a^{*2} U^{11} + \dots + 2 h k a^* b^* U^{12}]$

| Atom  | U <sup>11</sup> | U <sup>22</sup> | U <sup>33</sup> | U <sup>23</sup> | U <sup>13</sup> | U <sup>12</sup> |
|-------|-----------------|-----------------|-----------------|-----------------|-----------------|-----------------|
| Zn(1) | 12(1)           | 11(1)           | 12(1)           | 0               | 3(1)            | 0               |
| Cl(1) | 18(1)           | 32(1)           | 30(1)           | -6(1)           | 14(1)           | -2(1)           |
| Cl(2) | 34(1)           | 13(1)           | 30(1)           | 1(1)            | 6(1)            | 3(1)            |
| Cl(3) | 31(1)           | 18(1)           | 34(1)           | 4(1)            | -3(1)           | -11(1)          |
| S(1)  | 15(1)           | 13(1)           | 9(1)            | -1(1)           | 2(1)            | 0(1)            |
| O(1)  | 18(1)           | 18(1)           | 13(1)           | -1(1)           | 6(1)            | -1(1)           |
| O(2)  | 19(1)           | 18(1)           | 12(1)           | 1(1)            | -1(1)           | -1(1)           |
| N(1)  | 13(1)           | 13(1)           | 12(1)           | -2(1)           | 4(1)            | -1(1)           |
| N(2)  | 14(1)           | 12(1)           | 11(1)           | -1(1)           | 2(1)            | -1(1)           |
| C(1)  | 14(1)           | 12(1)           | 12(1)           | 1(1)            | 3(1)            | 1(1)            |
| C(2)  | 14(1)           | 12(1)           | 12(1)           | 0(1)            | 4(1)            | -1(1)           |
| C(3)  | 18(1)           | 15(1)           | 14(1)           | 0(1)            | 6(1)            | 1(1)            |
| C(4)  | 14(1)           | 17(1)           | 19(1)           | 1(1)            | 8(1)            | 0(1)            |
| C(5)  | 13(1)           | 17(1)           | 20(1)           | -1(1)           | 4(1)            | -2(1)           |
| C(6)  | 16(1)           | 14(1)           | 17(1)           | -3(1)           | 4(1)            | -2(1)           |
| C(7)  | 16(1)           | 13(1)           | 12(1)           | -1(1)           | 3(1)            | 0(1)            |
| C(8)  | 15(1)           | 12(1)           | 13(1)           | -1(1)           | 2(1)            | 0(1)            |
| C(9)  | 24(1)           | 17(1)           | 15(1)           | -4(1)           | -1(1)           | 0(1)            |
| C(10) | 32(1)           | 14(1)           | 22(1)           | -5(1)           | -2(1)           | -2(1)           |
| C(11) | 24(1)           | 14(1)           | 23(1)           | 1(1)            | 1(1)            | -1(1)           |
| C(12) | 24(1)           | 16(1)           | 15(1)           | 1(1)            | 1(1)            | -1(1)           |
| C(13) | 20(1)           | 14(1)           | 12(1)           | -1(1)           | 2(1)            | -2(1)           |
| C(14) | 45(1)           | 15(1)           | 32(1)           | 3(1)            | -1(1)           | -2(1)           |
| C(15) | 17(1)           | 12(1)           | 10(1)           | -1(1)           | 4(1)            | -2(1)           |
| C(16) | 17(1)           | 16(1)           | 13(1)           | 0(1)            | 4(1)            | 0(1)            |
| C(17) | 25(1)           | 12(1)           | 13(1)           | 1(1)            | 3(1)            | 1(1)            |
| C(18) | 22(1)           | 15(1)           | 16(1)           | 1(1)            | 1(1)            | -6(1)           |
| C(19) | 16(1)           | 21(1)           | 22(1)           | -1(1)           | 1(1)            | -4(1)           |
| C(20) | 16(1)           | 16(1)           | 17(1)           | -1(1)           | 1(1)            | -1(1)           |

**Table S8.** Hydrogen coordinates ( $\times 10^4$ ) and isotropic displacement parameters ( $\text{\AA}^2 \times 10^3$ ) for **2d**.

| Atom   | x    | y    | z    | U(iso) |
|--------|------|------|------|--------|
| H(3)   | 7618 | 4823 | 483  | 18     |
| H(5)   | 9138 | 6086 | 2385 | 20     |
| H(6)   | 7913 | 6245 | 3206 | 19     |
| H(7)   | 6275 | 4427 | 704  | 16     |
| H(9)   | 6698 | 7480 | 4560 | 23     |
| H(10)  | 6654 | 8541 | 3915 | 28     |
| H(12)  | 5898 | 7830 | 1114 | 22     |
| H(13)  | 5935 | 6767 | 1743 | 19     |
| H(14A) | 5963 | 8969 | 1314 | 48     |
| H(14B) | 6835 | 9170 | 2146 | 48     |
| H(14C) | 5813 | 9246 | 2371 | 48     |
| H(16)  | 6018 | 3467 | 1404 | 18     |
| H(19)  | 2791 | 3522 | 894  | 24     |
| H(20)  | 3630 | 4496 | 1128 | 20     |

**Table S9.** Torsion angles [°] for **2d**.

|                      |             |                         |             |
|----------------------|-------------|-------------------------|-------------|
| O(2)-S(1)-N(1)-C(1)  | -50.82(12)  | O(2)-S(1)-C(8)-C(9)     | -44.35(13)  |
| O(1)-S(1)-N(1)-C(1)  | -177.01(10) | O(1)-S(1)-C(8)-C(9)     | 81.53(13)   |
| C(8)-S(1)-N(1)-C(1)  | 67.65(12)   | N(1)-S(1)-C(8)-C(9)     | -167.07(11) |
| O(2)-S(1)-N(1)-Zn(1) | 132.79(6)   | C(13)-C(8)-C(9)-C(10)   | 0.7(2)      |
| O(1)-S(1)-N(1)-Zn(1) | 6.60(8)     | S(1)-C(8)-C(9)-C(10)    | -175.58(12) |
| C(8)-S(1)-N(1)-Zn(1) | -108.75(7)  | C(8)-C(9)-C(10)-C(11)   | 0.0(3)      |
| S(1)-N(1)-C(1)-C(6)  | 3.30(18)    | C(9)-C(10)-C(11)-C(12)  | -0.6(3)     |
| Zn(1)-N(1)-C(1)-C(6) | 178.99(10)  | C(9)-C(10)-C(11)-C(14)  | 178.63(17)  |
| S(1)-N(1)-C(1)-C(2)  | -177.23(10) | C(10)-C(11)-C(12)-C(13) | 0.7(2)      |
| Zn(1)-N(1)-C(1)-C(2) | -1.54(18)   | C(14)-C(11)-C(12)-C(13) | -178.56(16) |
| N(1)-C(1)-C(2)-C(3)  | 177.99(12)  | C(9)-C(8)-C(13)-C(12)   | -0.6(2)     |
| C(6)-C(1)-C(2)-C(3)  | -2.51(19)   | S(1)-C(8)-C(13)-C(12)   | 175.53(12)  |
| N(1)-C(1)-C(2)-C(7)  | -10.6(2)    | C(11)-C(12)-C(13)-C(8)  | -0.1(2)     |
| C(6)-C(1)-C(2)-C(7)  | 168.94(13)  | C(7)-N(2)-C(15)-C(20)   | -147.27(13) |
| C(1)-C(2)-C(3)-C(4)  | 1.4(2)      | Zn(1)-N(2)-C(15)-C(20)  | 40.02(16)   |
| C(7)-C(2)-C(3)-C(4)  | -171.21(13) | C(7)-N(2)-C(15)-C(16)   | 38.82(18)   |
| C(2)-C(3)-C(4)-C(5)  | 1.0(2)      | Zn(1)-N(2)-C(15)-C(16)  | -133.90(11) |
| C(2)-C(3)-C(4)-Cl(1) | 178.80(11)  | C(20)-C(15)-C(16)-C(17) | -0.1(2)     |
| C(3)-C(4)-C(5)-C(6)  | -2.1(2)     | N(2)-C(15)-C(16)-C(17)  | 173.79(12)  |
| Cl(1)-C(4)-C(5)-C(6) | -179.97(11) | C(15)-C(16)-C(17)-C(18) | -1.6(2)     |
| C(4)-C(5)-C(6)-C(1)  | 0.9(2)      | C(15)-C(16)-C(17)-Cl(2) | -179.78(10) |
| N(1)-C(1)-C(6)-C(5)  | -179.11(13) | C(16)-C(17)-C(18)-C(19) | 2.8(2)      |
| C(2)-C(1)-C(6)-C(5)  | 1.4(2)      | Cl(2)-C(17)-C(18)-C(19) | -179.07(11) |
| C(15)-N(2)-C(7)-C(2) | -164.58(13) | C(16)-C(17)-C(18)-Cl(3) | -174.59(11) |
| Zn(1)-N(2)-C(7)-C(2) | 7.9(2)      | Cl(2)-C(17)-C(18)-Cl(3) | 3.58(18)    |
| C(3)-C(2)-C(7)-N(2)  | 179.10(13)  | C(17)-C(18)-C(19)-C(20) | -2.3(2)     |
| C(1)-C(2)-C(7)-N(2)  | 7.2(2)      | Cl(3)-C(18)-C(19)-C(20) | 175.09(12)  |
| O(2)-S(1)-C(8)-C(13) | 139.42(12)  | C(18)-C(19)-C(20)-C(15) | 0.6(2)      |
| O(1)-S(1)-C(8)-C(13) | -94.70(13)  | C(16)-C(15)-C(20)-C(19) | 0.6(2)      |
| N(1)-S(1)-C(8)-C(13) | 16.70(14)   | N(2)-C(15)-C(20)-C(19)  | -173.34(13) |

Symmetry transformations used to generate equivalent atoms:

#1 -x+1, y, -z+1/2

# Elemental analysis of the azomethines **1a-e** and complexes **2a-e**

## БЛАНК ЗАКАЗА НА ПРОВЕДЕНИЕ ИССЛЕДОВАНИЯ СТРУКТУРЫ СОЕДИНЕНИЙ

|                                                                                                                                             |                                  |                                                              |                                              |                |              |              |     |
|---------------------------------------------------------------------------------------------------------------------------------------------|----------------------------------|--------------------------------------------------------------|----------------------------------------------|----------------|--------------|--------------|-----|
| <b>1a</b><br>                                              | Дата получения заказа            | Дата проведения анализа                                      | Масса образца, мг                            |                |              |              |     |
|                                                                                                                                             | Шифр<br><b>M-149</b>             | Мол. масса                                                   | Брутто-формула<br>$C_{20}H_{17}ClN_2O_2S$    |                |              |              |     |
|                                                                                                                                             | Физ. состояние<br><b>порошок</b> | Т. пл. (Т. кип.)<br>133-134°C                                | Устойчивость при хранении<br><b>устойчив</b> |                |              |              |     |
| Синтетик (лаборатория, факультет, подпись, телефон)<br><b>Милутка М.С.</b> Отдел координационных соединений НИИФОХ ЮФУ<br>+7(863) 297-51-89 |                                  | Зав. лаб. (рук. гр.) Фамилия, подпись<br><b>А.С. Бурлов,</b> |                                              |                |              |              |     |
| Оператор (Фамилия, подпись)<br><i>Этметченко</i>                                                                                            |                                  | Комментарии оператора<br><b>нет</b>                          |                                              |                |              |              |     |
| ЯМР                                                                                                                                         | ИК                               | УФ                                                           | Элементный анализ                            |                |              |              |     |
| Исследуемое ядро                                                                                                                            |                                  |                                                              | Элемент                                      | С              | Н            | Н            | Др. |
| Растворитель                                                                                                                                |                                  |                                                              | Вычислено, %                                 | 62.41          | 4.45         | 7.28         |     |
| Стандарт                                                                                                                                    |                                  |                                                              | Найдено, %                                   | 62.40<br>62.48 | 4.44<br>4.52 | 7.24<br>7.35 |     |
|                                                                                                                                             |                                  |                                                              | ср. 62.44 4.48 7.31                          |                |              |              |     |

## БЛАНК ЗАКАЗА НА ПРОВЕДЕНИЕ ИССЛЕДОВАНИЯ СТРУКТУРЫ СОЕДИНЕНИЙ

|                                                                                                                                             |                                  |                                                              |                                              |                |              |              |     |
|---------------------------------------------------------------------------------------------------------------------------------------------|----------------------------------|--------------------------------------------------------------|----------------------------------------------|----------------|--------------|--------------|-----|
| <b>1b</b><br>                                            | Дата получения заказа            | Дата проведения анализа                                      | Масса образца, мг                            |                |              |              |     |
|                                                                                                                                             | Шифр<br><b>M-150</b>             | Мол. масса                                                   | Брутто-формула<br>$C_{20}H_{16}Cl_2N_2O_2S$  |                |              |              |     |
|                                                                                                                                             | Физ. состояние<br><b>порошок</b> | Т. пл. (Т. кип.)<br>139-140°C                                | Устойчивость при хранении<br><b>устойчив</b> |                |              |              |     |
| Синтетик (лаборатория, факультет, подпись, телефон)<br><b>Милутка М.С.</b> Отдел координационных соединений НИИФОХ ЮФУ<br>+7(863) 297-51-89 |                                  | Зав. лаб. (рук. гр.) Фамилия, подпись<br><b>А.С. Бурлов,</b> |                                              |                |              |              |     |
| Оператор (Фамилия, подпись)<br><i>Этметченко</i>                                                                                            |                                  | Комментарии оператора<br><b>нет</b>                          |                                              |                |              |              |     |
| ЯМР                                                                                                                                         | ИК                               | УФ                                                           | Элементный анализ                            |                |              |              |     |
| Исследуемое ядро                                                                                                                            |                                  |                                                              | Элемент                                      | С              | Н            | Н            | Др. |
| Растворитель                                                                                                                                |                                  |                                                              | Вычислено, %                                 | 57.29          | 3.85         | 6.68         |     |
| Стандарт                                                                                                                                    |                                  |                                                              | Найдено, %                                   | 57.21<br>57.29 | 3.75<br>3.87 | 6.60<br>6.68 |     |
|                                                                                                                                             |                                  |                                                              | ср. 57.25 3.81 6.64                          |                |              |              |     |

# БЛАНК ЗАКАЗА НА ПРОВЕДЕНИЕ ИССЛЕДОВАНИЯ СТРУКТУРЫ СОЕДИНЕНИЙ

|                                                                                                                                              |                                            |    |                                                              |                              |                                              |                            |     |
|----------------------------------------------------------------------------------------------------------------------------------------------|--------------------------------------------|----|--------------------------------------------------------------|------------------------------|----------------------------------------------|----------------------------|-----|
| <p>1c</p>                                                   | Дата получения заказа<br><i>05.03.2020</i> |    | Дата проведения анализа<br><i>12.03.2020</i>                 |                              | Масса образца, мг                            |                            |     |
|                                                                                                                                              | Шифр<br><b>М-146</b>                       |    | Мол. масса                                                   |                              | Брутто-формула<br>$C_{20}H_{16}Cl_2N_2O_2S$  |                            |     |
|                                                                                                                                              | Физ. состояние<br><b>порошок</b>           |    | Т. пл. (Т. кип.)<br><b>181-182°C</b>                         |                              | Устойчивость при хранении<br><b>устойчив</b> |                            |     |
| Синтетик (лаборатория, факультет, подпись, телефон)<br><b>Милутка М.С.</b> Отдел координационных соединений НИИФХОХ ЮФУ<br>+7(863) 297-51-89 |                                            |    | Зав. лаб. (рук. гр.) Фамилия, подпись<br><b>А.С. Бурлов,</b> |                              |                                              |                            |     |
| Оператор (Фамилия, подпись)<br><i>Этметченко</i>                                                                                             |                                            |    | Комментарии оператора<br><b>нет</b>                          |                              |                                              |                            |     |
| ЯМР                                                                                                                                          | ИК                                         | УФ | Элементный анализ                                            |                              |                                              |                            |     |
| Исследуемое ядро                                                                                                                             |                                            |    | Элемент                                                      | С                            | Н                                            | Н                          | Др. |
| Растворитель                                                                                                                                 |                                            |    | Вычислено, %                                                 | 57.29                        | 3.85                                         | 6.68                       |     |
| Стандарт                                                                                                                                     |                                            |    | Найдено, %                                                   | <i>57,23</i><br><i>57,27</i> | <i>3,85</i><br><i>3,93</i>                   | <i>6,60</i><br><i>6,64</i> |     |

ср. *57,25 3,89 6,62*

# БЛАНК ЗАКАЗА НА ПРОВЕДЕНИЕ ИССЛЕДОВАНИЯ СТРУКТУРЫ СОЕДИНЕНИЙ

|                                                                                                                                              |                                            |    |                                                              |                              |                                              |                            |     |
|----------------------------------------------------------------------------------------------------------------------------------------------|--------------------------------------------|----|--------------------------------------------------------------|------------------------------|----------------------------------------------|----------------------------|-----|
| <p>1d</p> 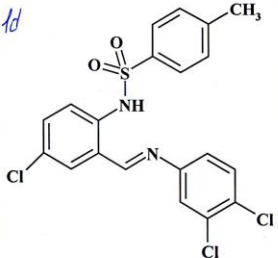                                                | Дата получения заказа<br><i>09.03.2020</i> |    | Дата проведения анализа<br><i>16.03.2020</i>                 |                              | Масса образца, мг                            |                            |     |
|                                                                                                                                              | Шифр<br><b>М-148</b>                       |    | Мол. масса                                                   |                              | Брутто-формула<br>$C_{20}H_{15}Cl_3N_2O_2S$  |                            |     |
|                                                                                                                                              | Физ. состояние<br><b>порошок</b>           |    | Т. пл. (Т. кип.)<br><b>154-155°C</b>                         |                              | Устойчивость при хранении<br><b>устойчив</b> |                            |     |
| Синтетик (лаборатория, факультет, подпись, телефон)<br><b>Милутка М.С.</b> Отдел координационных соединений НИИФХОХ ЮФУ<br>+7(863) 297-51-89 |                                            |    | Зав. лаб. (рук. гр.) Фамилия, подпись<br><b>А.С. Бурлов,</b> |                              |                                              |                            |     |
| Оператор (Фамилия, подпись)<br><i>Этметченко</i>                                                                                             |                                            |    | Комментарии оператора<br><b>нет</b>                          |                              |                                              |                            |     |
| ЯМР                                                                                                                                          | ИК                                         | УФ | Элементный анализ                                            |                              |                                              |                            |     |
| Исследуемое ядро                                                                                                                             |                                            |    | Элемент                                                      | С                            | Н                                            | Н                          | Др. |
| Растворитель                                                                                                                                 |                                            |    | Вычислено, %                                                 | 52.94                        | 3.33                                         | 6.17                       |     |
| Стандарт                                                                                                                                     |                                            |    | Найдено, %                                                   | <i>52,87</i><br><i>52,93</i> | <i>3,33</i><br><i>3,41</i>                   | <i>6,17</i><br><i>6,25</i> |     |

ср. *52,90 3,37 6,21*

# БЛАНК ЗАКАЗА НА ПРОВЕДЕНИЕ ИССЛЕДОВАНИЯ СТРУКТУРЫ СОЕДИНЕНИЙ

|                                                                                              |                       |                                                                                                 |                                                                 |              |              |     |  |
|----------------------------------------------------------------------------------------------|-----------------------|-------------------------------------------------------------------------------------------------|-----------------------------------------------------------------|--------------|--------------|-----|--|
| <p>1e</p> 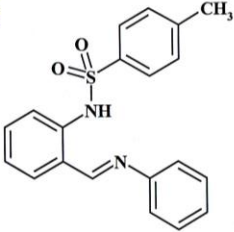  | Дата получения заказа | Дата проведения анализа                                                                         | Масса образца, мг                                               |              |              |     |  |
|                                                                                              | Шифр                  | Мол. масса                                                                                      | Брутто-формула                                                  |              |              |     |  |
|                                                                                              | Физ. состояние        | Т. пл. (Т. кип.)                                                                                | Устойчивость при хранении                                       |              |              |     |  |
|                                                                                              | 11.03.2020            | 18.03.2020                                                                                      |                                                                 |              |              |     |  |
|                                                                                              | B962                  |                                                                                                 | C <sub>20</sub> H <sub>18</sub> N <sub>2</sub> O <sub>2</sub> S |              |              |     |  |
|                                                                                              | порошок               | 99-100°C                                                                                        | устойчив                                                        |              |              |     |  |
| Синтетик (лаборатория, факультет, подпись, телефон)                                          |                       | Зав. лаб. (рук. гр.) Фамилия, подпись                                                           |                                                                 |              |              |     |  |
| Милутка М.С. Отдел координационных соединений НИИФХ ЮФУ                                      |                       | А.С. Бурлов,  |                                                                 |              |              |     |  |
| +7(863) 297-51-89                                                                            |                       |                                                                                                 |                                                                 |              |              |     |  |
| Оператор (Фамилия, подпись)                                                                  |                       | Комментарии оператора                                                                           |                                                                 |              |              |     |  |
| Этметченко  |                       | нет                                                                                             |                                                                 |              |              |     |  |
| ЯМР                                                                                          | ИК                    | Элементный анализ                                                                               |                                                                 |              |              |     |  |
| Исследуемое ядро                                                                             |                       | Элемент                                                                                         | С                                                               | Н            | Н            | Др. |  |
| Растворитель                                                                                 |                       | Вычислено, %                                                                                    | 68.55                                                           | 5.18         | 7.99         |     |  |
| Стандарт                                                                                     |                       | Найдено, %                                                                                      | 68,48<br>68,54                                                  | 5,04<br>5,13 | 7,87<br>7,95 |     |  |

ср. 68,54 5,09 7,91

# БЛАНК ЗАКАЗА НА ПРОВЕДЕНИЕ ИССЛЕДОВАНИЯ СТРУКТУРЫ СОЕДИНЕНИЙ

|                                                                                                |                       |                                                                                                    |                                                                                                 |              |              |     |  |
|------------------------------------------------------------------------------------------------|-----------------------|----------------------------------------------------------------------------------------------------|-------------------------------------------------------------------------------------------------|--------------|--------------|-----|--|
| <p>2a</p>   | Дата получения заказа | Дата проведения анализа                                                                            | Масса образца, мг                                                                               |              |              |     |  |
|                                                                                                | Шифр                  | Мол. масса                                                                                         | Брутто-формула                                                                                  |              |              |     |  |
|                                                                                                | Физ. состояние        | Т. пл. (Т. кип.)                                                                                   | Устойчивость при хранении                                                                       |              |              |     |  |
|                                                                                                | 03.08.2020            | 10.08.2020                                                                                         |                                                                                                 |              |              |     |  |
|                                                                                                | M-154                 |                                                                                                    | C <sub>40</sub> H <sub>32</sub> Cl <sub>2</sub> N <sub>4</sub> O <sub>4</sub> S <sub>2</sub> Zn |              |              |     |  |
|                                                                                                | порошок               | >300°C                                                                                             | устойчив                                                                                        |              |              |     |  |
| Синтетик (лаборатория, факультет, подпись, телефон)                                            |                       | Зав. лаб. (рук. гр.) Фамилия, подпись                                                              |                                                                                                 |              |              |     |  |
| Милутка М.С. Отдел координационных соединений НИИФХ ЮФУ                                        |                       | А.С. Бурлов,  |                                                                                                 |              |              |     |  |
| +7(863) 297-51-89                                                                              |                       |                                                                                                    |                                                                                                 |              |              |     |  |
| Оператор (Фамилия, подпись)                                                                    |                       | Комментарии оператора                                                                              |                                                                                                 |              |              |     |  |
| Этметченко  |                       | нет                                                                                                |                                                                                                 |              |              |     |  |
| ЯМР                                                                                            | ИК                    | Элементный анализ                                                                                  |                                                                                                 |              |              |     |  |
| Исследуемое ядро                                                                               |                       | Элемент                                                                                            | С                                                                                               | Н            | Н            | Др. |  |
| Растворитель                                                                                   |                       | Вычислено, %                                                                                       | 57.67                                                                                           | 3.87         | 6.72         |     |  |
| Стандарт                                                                                       |                       | Найдено, %                                                                                         | 57,59<br>57,65                                                                                  | 3,87<br>3,93 | 6,67<br>6,73 |     |  |

ср. 57,62 3,90 6,70



# БЛАНК ЗАКАЗА НА ПРОВЕДЕНИЕ ИССЛЕДОВАНИЯ СТРУКТУРЫ СОЕДИНЕНИЙ

|                                                                                                                                     |                            |                                                       |                                                                                                                   |
|-------------------------------------------------------------------------------------------------------------------------------------|----------------------------|-------------------------------------------------------|-------------------------------------------------------------------------------------------------------------------|
| <p>2б</p> 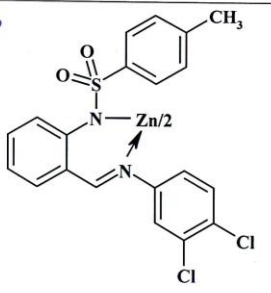                                         | Дата получения заказа      | Дата проведения анализа                               | Масса образца, мг                                                                                                 |
|                                                                                                                                     | 05.08.2020                 | 12.08.2020                                            |                                                                                                                   |
|                                                                                                                                     | Шифр<br>M-156              | Мол. масса                                            | Брутто-формула<br>C <sub>40</sub> H <sub>30</sub> Cl <sub>4</sub> N <sub>4</sub> O <sub>4</sub> S <sub>2</sub> Zn |
| Физ. состояние<br>порошок                                                                                                           | Т. пл. (Т. кип.)<br>>300°C | Устойчивость при хранении<br>устойчив                 |                                                                                                                   |
| Синтетик (лаборатория, факультет, подпись, телефон)<br>Милутка М.С. Отдел координационных соединений НИИФХ ЮФУ<br>+7(863) 297-51-89 |                            | Зав. лаб. (рук. гр.) Фамилия, подпись<br>А.С. Бурлов, |                                                                                                                   |
| Оператор (Фамилия, подпись)<br>Этметченко                                                                                           |                            | Комментарии оператора<br>нет                          |                                                                                                                   |
| ЯМР                                                                                                                                 | ИК                         | Элементный анализ                                     |                                                                                                                   |
| Исследуемое ядро                                                                                                                    |                            | Элемент                                               | С Н N Др.                                                                                                         |
| Растворитель                                                                                                                        |                            | Вычислено, %                                          | 53.26 3.35 6.21                                                                                                   |
| Стандарт                                                                                                                            |                            | Найдено, %                                            | 53,19 3,37 6,21<br>53,23 3,41 6,25                                                                                |

ср. 53,21 3,39 6,23

# БЛАНК ЗАКАЗА НА ПРОВЕДЕНИЕ ИССЛЕДОВАНИЯ СТРУКТУРЫ СОЕДИНЕНИЙ

|                                                                                                                                     |                            |                                                       |                                                                                                                   |
|-------------------------------------------------------------------------------------------------------------------------------------|----------------------------|-------------------------------------------------------|-------------------------------------------------------------------------------------------------------------------|
| <p>2с</p> 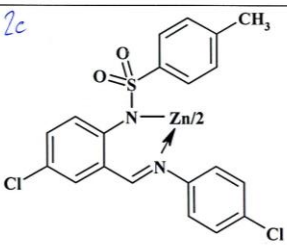                                       | Дата получения заказа      | Дата проведения анализа                               | Масса образца, мг                                                                                                 |
|                                                                                                                                     | 27.08.2020                 | 03.09.2020                                            |                                                                                                                   |
|                                                                                                                                     | Шифр<br>M-147              | Мол. масса                                            | Брутто-формула<br>C <sub>40</sub> H <sub>30</sub> Cl <sub>4</sub> N <sub>4</sub> O <sub>4</sub> S <sub>2</sub> Zn |
| Физ. состояние<br>порошок                                                                                                           | Т. пл. (Т. кип.)<br>>300°C | Устойчивость при хранении<br>устойчив                 |                                                                                                                   |
| Синтетик (лаборатория, факультет, подпись, телефон)<br>Милутка М.С. Отдел координационных соединений НИИФХ ЮФУ<br>+7(863) 297-51-89 |                            | Зав. лаб. (рук. гр.) Фамилия, подпись<br>А.С. Бурлов, |                                                                                                                   |
| Оператор (Фамилия, подпись)<br>Этметченко                                                                                           |                            | Комментарии оператора<br>нет                          |                                                                                                                   |
| ЯМР                                                                                                                                 | ИК                         | Элементный анализ                                     |                                                                                                                   |
| Исследуемое ядро                                                                                                                    |                            | Элемент                                               | С Н N Др.                                                                                                         |
| Растворитель                                                                                                                        |                            | Вычислено, %                                          | 53.26 3.35 6.21                                                                                                   |
| Стандарт                                                                                                                            |                            | Найдено, %                                            | 53,18 3,35 6,21<br>53,26 3,43 6,29                                                                                |

ср. 53,22 3,39 6,25

# БЛАНК ЗАКАЗА НА ПРОВЕДЕНИЕ ИССЛЕДОВАНИЯ СТРУКТУРЫ СОЕДИНЕНИЙ

|                                                                                                                                      |                               |                                                                     |                                                 |              |              |     |  |
|--------------------------------------------------------------------------------------------------------------------------------------|-------------------------------|---------------------------------------------------------------------|-------------------------------------------------|--------------|--------------|-----|--|
| <p>2d</p>                                                                                                                            | Дата получения заказа         | Дата проведения анализа                                             | Масса образца, мг                               |              |              |     |  |
|                                                                                                                                      | 31.08.2020                    | 07.09.2020                                                          |                                                 |              |              |     |  |
|                                                                                                                                      | Шифр<br>M-152                 | Мол. масса                                                          | Брутто-формула<br>$C_{40}H_{28}Cl_6N_4O_4S_2Zn$ |              |              |     |  |
| Физ. состояние<br>порошок                                                                                                            | Т. пл. (Т. кип.)<br>273-274°C | Устойчивость при хранении<br>устойчив                               |                                                 |              |              |     |  |
| Синтетик (лаборатория, факультет, подпись, телефон)<br>Милутка М.С. Отдел координационных соединений НИИФОХ ЮФУ<br>+7(863) 297-51-89 |                               | Зав. лаб. (рук. гр.) Фамилия, подпись<br>А.С. Бурлов, <i>Бурлов</i> |                                                 |              |              |     |  |
| Оператор (Фамилия, подпись)<br><i>Этметчен</i>                                                                                       |                               | Комментарии оператора<br>нет                                        |                                                 |              |              |     |  |
| ЯМР                                                                                                                                  | ИК                            | Элементный анализ                                                   |                                                 |              |              |     |  |
| Исследуемое ядро                                                                                                                     |                               | Элемент                                                             | C                                               | H            | N            | Др. |  |
| Растворитель                                                                                                                         |                               | Вычислено, %                                                        | 49.48                                           | 2.91         | 5.77         |     |  |
| Стандарт                                                                                                                             |                               | Найдено, %                                                          | 49,40<br>49,46                                  | 2,92<br>2,98 | 5,73<br>5,77 |     |  |

ср. 49,43 2,95 5,75

# БЛАНК ЗАКАЗА НА ПРОВЕДЕНИЕ ИССЛЕДОВАНИЯ СТРУКТУРЫ СОЕДИНЕНИЙ

|                                                                                                                                      |                               |                                                                     |                                             |              |              |     |  |
|--------------------------------------------------------------------------------------------------------------------------------------|-------------------------------|---------------------------------------------------------------------|---------------------------------------------|--------------|--------------|-----|--|
| <p>2e</p>                                                                                                                            | Дата получения заказа         | Дата проведения анализа                                             | Масса образца, мг                           |              |              |     |  |
|                                                                                                                                      | 03.09.2020                    | 10.09.2020                                                          |                                             |              |              |     |  |
|                                                                                                                                      | Шифр<br>B947                  | Мол. масса                                                          | Брутто-формула<br>$C_{40}H_{34}N_4O_4S_2Zn$ |              |              |     |  |
| Физ. состояние<br>порошок                                                                                                            | Т. пл. (Т. кип.)<br>295-296°C | Устойчивость при хранении<br>устойчив                               |                                             |              |              |     |  |
| Синтетик (лаборатория, факультет, подпись, телефон)<br>Милутка М.С. Отдел координационных соединений НИИФОХ ЮФУ<br>+7(863) 297-51-89 |                               | Зав. лаб. (рук. гр.) Фамилия, подпись<br>А.С. Бурлов, <i>Бурлов</i> |                                             |              |              |     |  |
| Оператор (Фамилия, подпись)<br><i>Этметчен</i>                                                                                       |                               | Комментарии оператора<br>нет                                        |                                             |              |              |     |  |
| ЯМР                                                                                                                                  | ИК                            | Элементный анализ                                                   |                                             |              |              |     |  |
| Исследуемое ядро                                                                                                                     |                               | Элемент                                                             | C                                           | H            | N            | Др. |  |
| Растворитель                                                                                                                         |                               | Вычислено, %                                                        | 62.86                                       | 4.48         | 7.33         |     |  |
| Стандарт                                                                                                                             |                               | Найдено, %                                                          | 62,67<br>62,41                              | 4,50<br>4,54 | 7,38<br>7,42 |     |  |

ср. 62,69 4,52 7,40



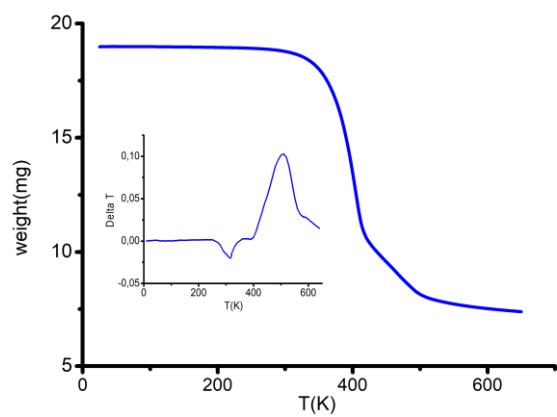

a

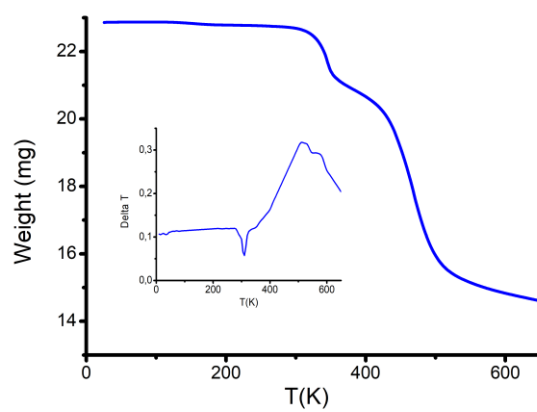

b

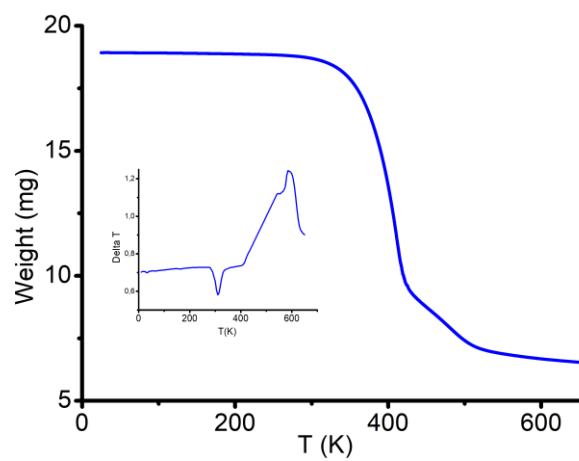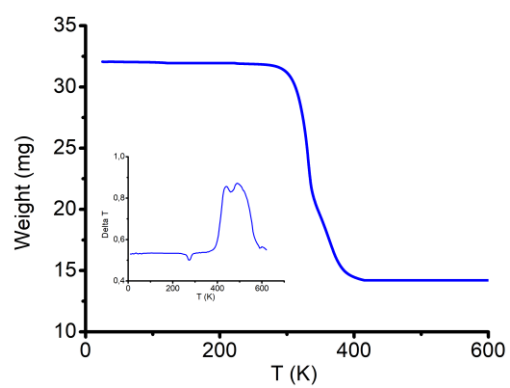

Supplement: s1 [file s1]
